# Supplementary material for: Antimalarial Activity of Axidjiferosides, New β-Galactosylceramides from the African Sponge Axinyssa djiferi
Source: MDPI journal article supplement (doi:10.3390/md11041304), 2013-04-17
Supplement: s1 [file s1]

marinedrugs-11-01304-s001.mol
  corina  04151405253D 1   1.00000     0.00000 
CORINA 3.49 0023  12.04.2013
 42 42  0  0  0  0  0  0  0  0999 V2000
    0.0537    1.3139    0.2507 C   0  0  0  0  0  0  0  0  0  0  0  0
   -0.7038    1.9121   -0.9388 C   0  0  0  0  0  0  0  0  0  0  0  0
   -0.0460    1.4395   -2.2388 C   0  0  0  0  0  0  0  0  0  0  0  0
   -0.0337   -0.0911   -2.2682 C   0  0  0  0  0  0  0  0  0  0  0  0
    0.6591   -0.5828   -1.1191 O   0  0  0  0  0  0  0  0  0  0  0  0
    0.0621   -0.2118    0.1251 C   0  0  0  0  0  0  0  0  0  0  0  0
    1.3974    1.8002    0.2545 O   0  0  0  0  0  0  0  0  0  0  0  0
    0.8683   -0.8142    1.2776 C   0  0  0  0  0  0  0  0  0  0  0  0
    0.7806   -2.2395    1.2264 O   0  0  0  0  0  0  0  0  0  0  0  0
   -0.6537    3.3386   -0.8688 O   0  0  0  0  0  0  0  0  0  0  0  0
   -0.7879    1.9326   -3.3562 O   0  0  0  0  0  0  0  0  0  0  0  0
   -1.3769   -0.5787   -2.2596 O   0  0  0  0  0  0  0  0  0  0  0  0
   -1.4812   -1.9972   -2.3978 C   0  0  0  0  0  0  0  0  0  0  0  0
   -2.9558   -2.4047   -2.3756 C   0  0  0  0  0  0  0  0  0  0  0  0
   -3.6107   -1.8796   -1.0964 C   0  0  0  0  0  0  0  0  0  0  0  0
   -5.0466   -2.4006   -1.0078 C   0  0  0  0  0  0  0  0  0  0  0  0
   -5.7016   -1.8755    0.2714 C   0  0  0  0  0  0  0  0  0  0  0  0
   -7.0713   -2.4858    0.4214 C   0  0  0  0  0  0  0  0  0  0  0  0
   -7.3856   -3.1280    1.5190 C   0  0  0  0  0  0  0  0  0  0  0  0
   -8.7553   -3.7383    1.6690 C   0  0  0  0  0  0  0  0  0  0  0  0
   -8.6175   -5.2262    1.9973 C   0  0  0  0  0  0  0  0  0  0  0  0
  -10.0081   -5.8458    2.1496 C   0  0  0  0  0  0  0  0  0  0  0  0
   -9.8703   -7.3338    2.4780 C   0  0  0  0  0  0  0  0  0  0  0  0
  -11.2609   -7.9534    2.6303 C   0  0  0  0  0  0  0  0  0  0  0  0
  -11.1231   -9.4414    2.9586 C   0  0  0  0  0  0  0  0  0  0  0  0
  -12.5138  -10.0610    3.1109 C   0  0  0  0  0  0  0  0  0  0  0  0
  -12.3760  -11.5490    3.4392 C   0  0  0  0  0  0  0  0  0  0  0  0
  -13.7666  -12.1685    3.5915 C   0  0  0  0  0  0  0  0  0  0  0  0
  -13.6288  -13.6565    3.9198 C   0  0  0  0  0  0  0  0  0  0  0  0
  -15.0194  -14.2761    4.0721 C   0  0  0  0  0  0  0  0  0  0  0  0
   -2.8692   -2.3315    0.0385 O   0  0  0  0  0  0  0  0  0  0  0  0
   -3.6370   -1.8368   -3.5416 N   0  0  0  0  0  0  0  0  0  0  0  0
   -5.7881   -1.9487   -2.1427 O   0  0  0  0  0  0  0  0  0  0  0  0
   -3.6086   -2.4873   -4.7217 C   0  0  0  0  0  0  0  0  0  0  0  0
   -3.0191   -3.5428   -4.8183 O   0  0  0  0  0  0  0  0  0  0  0  0
   -4.3094   -1.9031   -5.9211 C   0  0  0  0  0  0  0  0  0  0  0  0
   -3.6328   -0.5893   -6.3173 C   0  0  0  0  0  0  0  0  0  0  0  0
   -4.4184    0.0662   -7.4548 C   0  0  0  0  0  0  0  0  0  0  0  0
   -3.7418    1.3800   -7.8510 C   0  0  0  0  0  0  0  0  0  0  0  0
   -4.5275    2.0355   -8.9886 C   0  0  0  0  0  0  0  0  0  0  0  0
   -3.8509    3.3493   -9.3848 C   0  0  0  0  0  0  0  0  0  0  0  0
   -4.2360   -2.8243   -7.0111 O   0  0  0  0  0  0  0  0  0  0  0  0
  4  5  1  0      
  5  6  1  0      
  6  1  1  0      
  1  7  1  0      
  6  8  1  0      
  8  9  1  0      
  2 10  1  0      
  3 11  1  0      
  4 12  1  0      
 12 13  1  0      
 13 14  1  0      
 14 15  1  0      
 15 16  1  0      
 16 17  1  0      
 17 18  1  0      
 18 19  2  0      
 19 20  1  0      
 20 21  1  0      
 21 22  1  0      
 22 23  1  0      
 23 24  1  0      
 24 25  1  0      
 25 26  1  0      
 26 27  1  0      
 27 28  1  0      
 28 29  1  0      
 29 30  1  0      
 15 31  1  0      
 14 32  1  0      
 16 33  1  0      
 32 34  1  0      
 34 35  2  0      
 34 36  1  0      
 36 37  1  0      
 37 38  1  0      
 38 39  1  0      
 39 40  1  0      
 40 41  1  0      
 36 42  1  0      
  4  3  1  0      
  3  2  1  0      
  2  1  1  0      
M  STY  1   1 SRU
M  SLB  1   1   1
M  SCN  1   1 HT 
M  SAL   1  1  39
M  SBL   1  2  37  36
M  SMT   1 18
M  SDI   1  4   -0.2348    1.4438   -0.2348    0.6188
M  SDI   1  4   -0.9493    0.6188   -0.9493    1.4438
M  SBT  1   1   1
M  END
$$$$
