# Supplementary material for: Antimalarial Activity of Axidjiferosides, New β-Galactosylceramides from the African Sponge Axinyssa djiferi
Source: MDPI journal article supplement (doi:10.3390/md11041304), 2013-04-17
Supplement: s2 [file s2]

marinedrugs-11-01304-s001.mol
  ChemDraw03101421082D

 42 42  0  0  0  0  0  0  0  0999 V2000
   -7.5972   -0.5230    0.0000 C   0  0  0  0  0  0  0  0  0  0  0  0
   -7.1847   -1.2375    0.0000 C   0  0  0  0  0  0  0  0  0  0  0  0
   -6.3866   -1.0284    0.0000 C   0  0  0  0  0  0  0  0  0  0  0  0
   -5.5934   -1.2375    0.0000 C   0  0  0  0  0  0  0  0  0  0  0  0
   -6.0058   -0.5230    0.0000 O   0  0  0  0  0  0  0  0  0  0  0  0
   -6.8040   -0.7320    0.0000 C   0  0  0  0  0  0  0  0  0  0  0  0
   -7.5972    0.3020    0.0000 O   0  0  0  0  0  0  0  0  0  0  0  0
   -7.3285   -0.2562    0.0000 C   0  0  0  0  0  0  0  0  0  0  0  0
   -6.6141    0.1563    0.0000 O   0  0  0  0  0  0  0  0  0  0  0  0
   -7.9816   -1.0240    0.0000 O   0  0  0  0  0  0  0  0  0  0  0  0
   -5.8032   -1.6118    0.0000 O   0  0  0  0  0  0  0  0  0  0  0  0
   -4.8789   -0.8250    0.0000 O   0  0  0  0  0  0  0  0  0  0  0  0
   -4.1644   -1.2375    0.0000 C   0  0  0  0  0  0  0  0  0  0  0  0
   -3.4500   -0.8250    0.0000 C   0  0  0  0  0  0  0  0  0  0  0  0
   -2.7355   -1.2375    0.0000 C   0  0  0  0  0  0  0  0  0  0  0  0
   -2.0210   -0.8250    0.0000 C   0  0  0  0  0  0  0  0  0  0  0  0
   -1.3065   -1.2375    0.0000 C   0  0  0  0  0  0  0  0  0  0  0  0
   -0.5921   -0.8250    0.0000 C   0  0  0  0  0  0  0  0  0  0  0  0
    0.1224   -1.2375    0.0000 C   0  0  0  0  0  0  0  0  0  0  0  0
    0.8369   -0.8250    0.0000 C   0  0  0  0  0  0  0  0  0  0  0  0
    1.5513   -1.2375    0.0000 C   0  0  0  0  0  0  0  0  0  0  0  0
    2.2658   -0.8250    0.0000 C   0  0  0  0  0  0  0  0  0  0  0  0
    2.9803   -1.2375    0.0000 C   0  0  0  0  0  0  0  0  0  0  0  0
    3.6948   -0.8250    0.0000 C   0  0  0  0  0  0  0  0  0  0  0  0
    4.4092   -1.2375    0.0000 C   0  0  0  0  0  0  0  0  0  0  0  0
    5.1237   -0.8250    0.0000 C   0  0  0  0  0  0  0  0  0  0  0  0
    5.8382   -1.2375    0.0000 C   0  0  0  0  0  0  0  0  0  0  0  0
    6.5526   -0.8250    0.0000 C   0  0  0  0  0  0  0  0  0  0  0  0
    7.2671   -1.2375    0.0000 C   0  0  0  0  0  0  0  0  0  0  0  0
    7.9816   -0.8250    0.0000 C   0  0  0  0  0  0  0  0  0  0  0  0
   -2.7355   -2.0625    0.0000 O   0  0  0  0  0  0  0  0  0  0  0  0
   -3.4500    0.0000    0.0000 N   0  0  0  0  0  0  0  0  0  0  0  0
   -2.0210    0.0000    0.0000 O   0  0  0  0  0  0  0  0  0  0  0  0
   -3.4500    0.8250    0.0000 C   0  0  0  0  0  0  0  0  0  0  0  0
   -4.1644    1.2375    0.0000 O   0  0  0  0  0  0  0  0  0  0  0  0
   -2.7355    1.2375    0.0000 C   0  0  0  0  0  0  0  0  0  0  0  0
   -2.0210    0.8250    0.0000 C   0  0  0  0  0  0  0  0  0  0  0  0
   -1.3065    1.2375    0.0000 C   0  0  0  0  0  0  0  0  0  0  0  0
   -0.5921    0.8250    0.0000 C   0  0  0  0  0  0  0  0  0  0  0  0
    0.1224    1.2375    0.0000 C   0  0  0  0  0  0  0  0  0  0  0  0
    0.8369    0.8250    0.0000 C   0  0  0  0  0  0  0  0  0  0  0  0
   -2.7355    2.0625    0.0000 O   0  0  0  0  0  0  0  0  0  0  0  0
  4  5  1  0      
  5  6  1  0      
  6  1  1  0      
  1  7  1  0      
  6  8  1  0      
  8  9  1  0      
  2 10  1  0      
  3 11  1  0      
  4 12  1  0      
 12 13  1  0      
 13 14  1  0      
 14 15  1  0      
 15 16  1  0      
 16 17  1  0      
 17 18  1  0      
 18 19  2  0      
 19 20  1  0      
 20 21  1  0      
 21 22  1  0      
 22 23  1  0      
 23 24  1  0      
 24 25  1  0      
 25 26  1  0      
 26 27  1  0      
 27 28  1  0      
 28 29  1  0      
 29 30  1  0      
 15 31  1  1      
 14 32  1  6      
 16 33  1  6      
 32 34  1  0      
 34 35  2  0      
 34 36  1  0      
 36 37  1  0      
 37 38  1  0      
 38 39  1  0      
 39 40  1  0      
 40 41  1  0      
 36 42  1  6      
  4  3  1  1      
  3  2  1  1      
  2  1  1  1      
M  STY  1   1 SRU
M  SLB  1   1   1
M  SCN  1   1 HT 
M  SAL   1  1  39
M  SBL   1  2  37  36
M  SMT   1 18
M  SDI   1  4   -0.2348    1.4438   -0.2348    0.6188
M  SDI   1  4   -0.9493    0.6188   -0.9493    1.4438
M  SBT  1   1   1
M  END
